# Supplementary material
Source: Royal Society of Chemistry journal article supplement (doi:10.1039/d6tc00703a)
Supplement: d6tc00703a1.pdf [file d6tc00703a1.pdf]

# **Support Information**

## **Molten salt-mediated cyano group augmentation and morphology modulation in carbon nitride for boosting photocatalytic activity**

*Jiahao Song<sup>a</sup>, Heng Li<sup>a\*</sup>, Zihao Yuan<sup>a</sup>, Enze Hu<sup>a</sup>, Hongfei Bao<sup>a</sup>, Dongdong Zhang<sup>a</sup>, Huilin Hou<sup>a</sup>,*

*Weiyu Yang<sup>a</sup>, Hongli Yang<sup>a\*</sup> and Xiaoqiang Zhan<sup>a\*</sup>*

*<sup>a</sup>Institute of Micro/Nano Materials and Devices, Ningbo University of Technology, Ningbo, 315211, P.*

*R. China*

---

\*Corresponding authors. E-mails: [liheng2043@outlook.com](mailto:liheng2043@outlook.com) (H. Li), [cumtmaterial@163.com](mailto:cumtmaterial@163.com) (H. Yang) and [zhanxiaoqiang777@163.com](mailto:zhanxiaoqiang777@163.com) (X. Zhan)

Tel: +86-574-87080966, Fax: +86-574-87081221.

## Computer methods

All density functional theory calculations were carried out with the Vienna ab initio simulation package (VASP) version 6.2.1. The exchange-correlation energy was described using the Perdew-Burke-Ernzerhof (PBE) functional within the generalized gradient approximation framework. The interaction between valence electrons and ionic cores was treated by the projector augmented-wave (PAW) approach. A kinetic energy cutoff of 500 eV was adopted for the plane-wave basis set. Structural relaxations were considered converged when the total energy change between successive electronic steps was below  $1 \times 10^{-5}$  eV and the residual force on each atom was less than 0.02 eV/Å. To account for long-range dispersion effects, Grimme's D3 correction was included in all calculations. The adsorption energy was evaluated according to the following expression:

$$E_{\text{ads}} = E_{\text{tot}} - (E_{\text{sub}} + E_{\text{mol}})$$

where  $E_{\text{tot}}$  is the total energy of the adsorbate-substrate complex,  $E_{\text{sub}}$  is the energy of the isolated substrate, and  $E_{\text{mol}}$  is the energy of the isolated adsorbate.

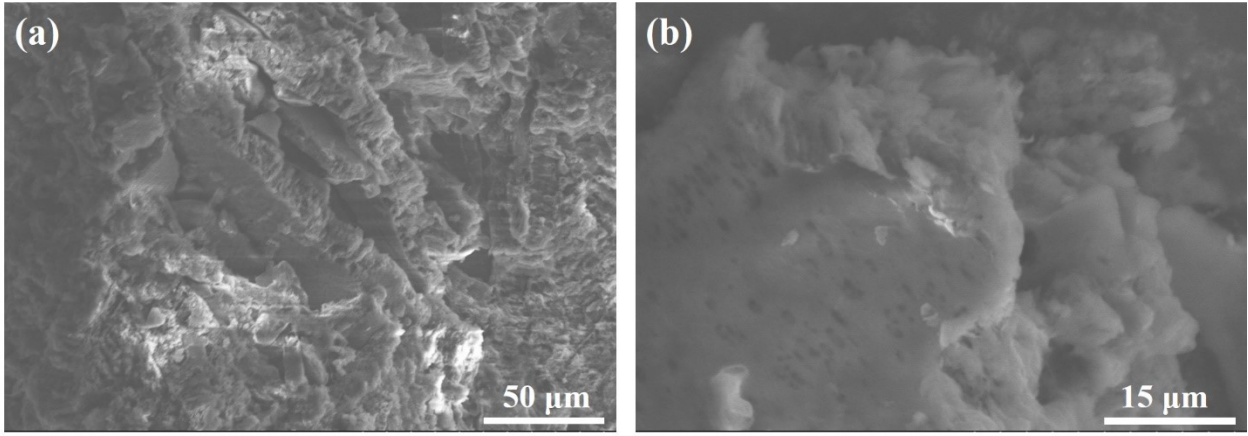

**Fig. S1** SEM images of TCN

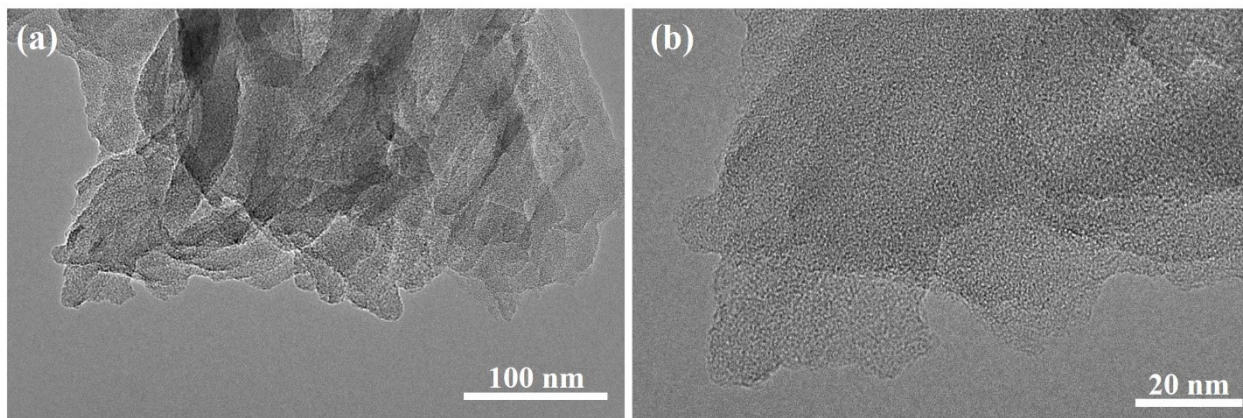

**Fig. S2** (a) TEM images and (b) HRTEM images of TCN

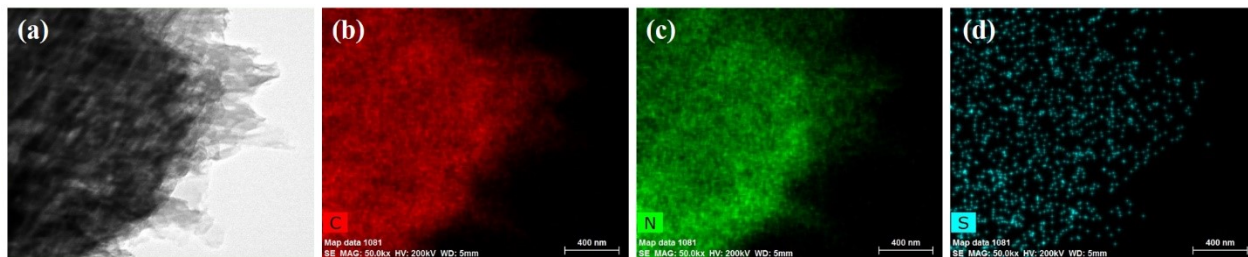

**Fig. S3** TEM-EDS elemental maps of TCN

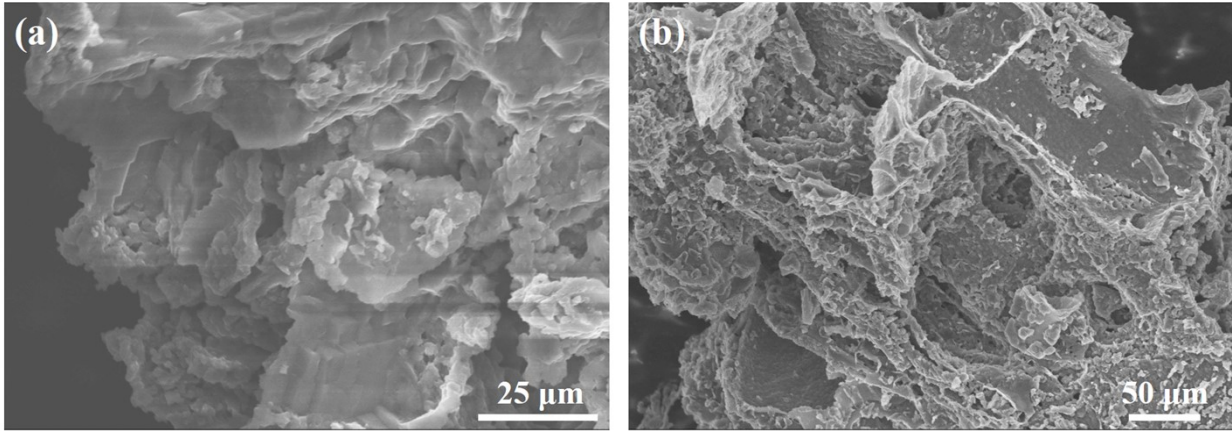

**Fig. S4** SEM images of T-CN-K

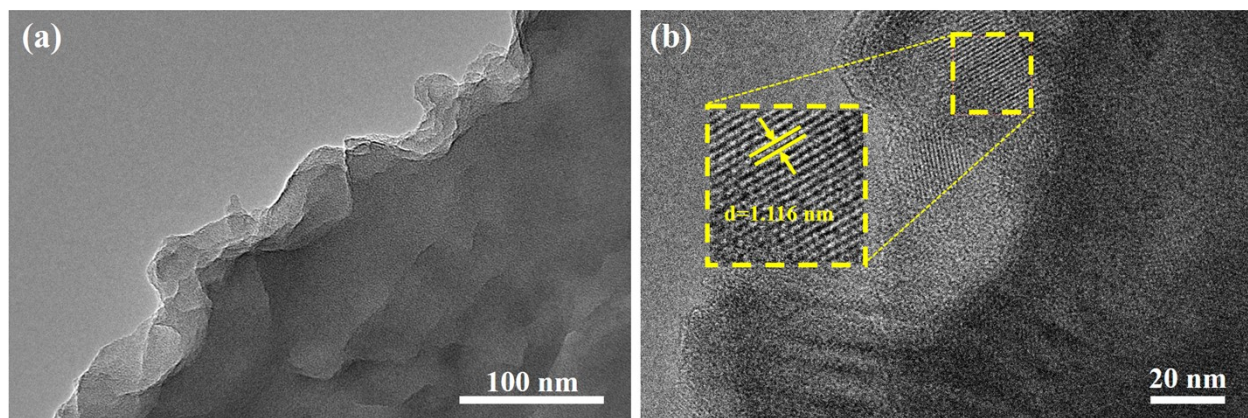

**Fig. S5** TEM images and HRTEM images of T-CN-K

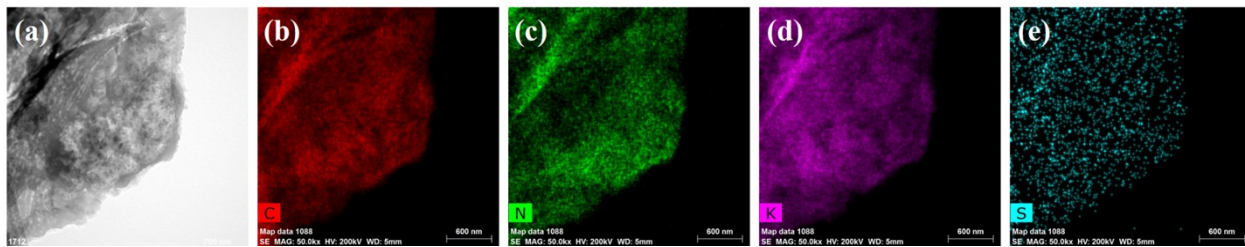

**Fig. S6** TEM-EDS elemental maps of T-CN-K

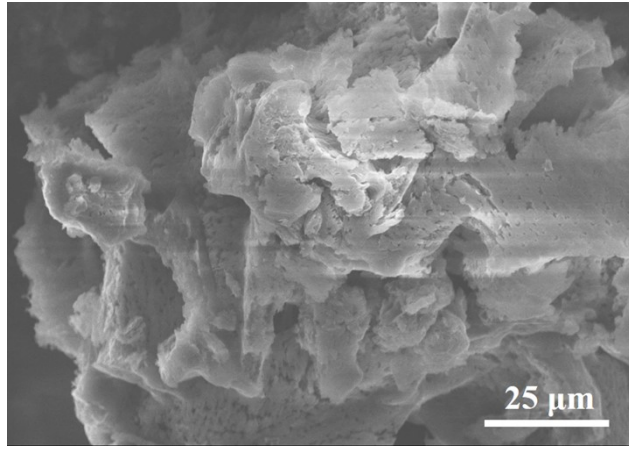

**Fig. S7** SEM images of U1T5-CN

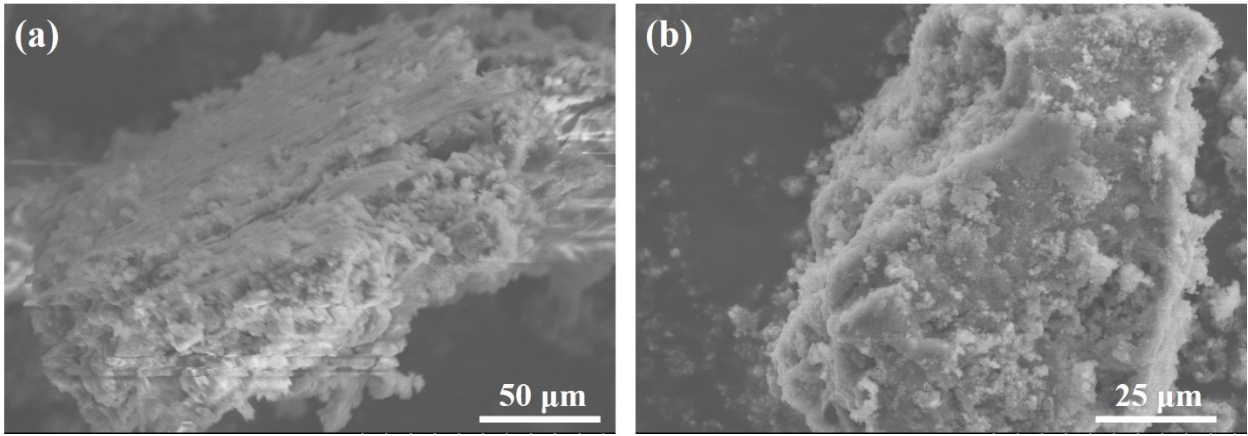

**Fig. S8** SEM images of U1T5-CN-K

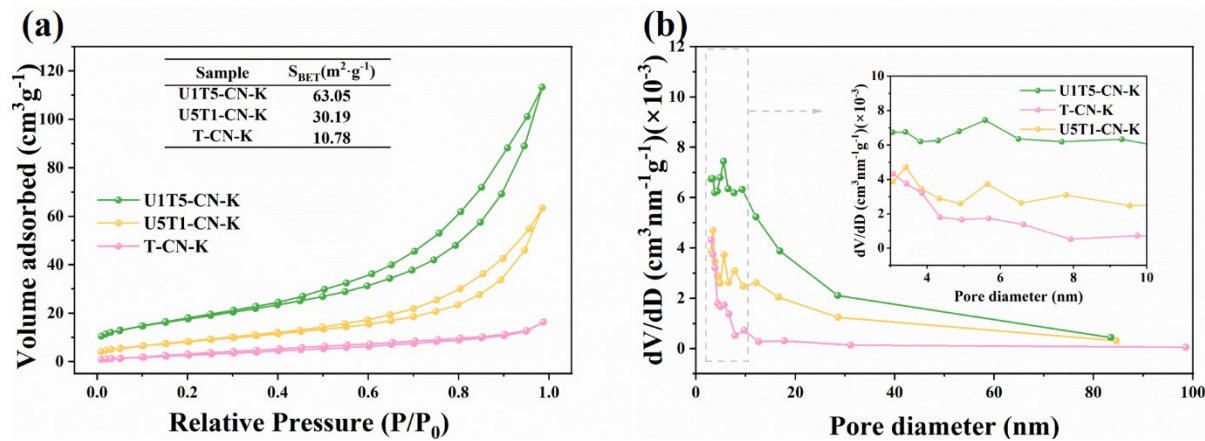

**Fig. S9** (a)  $\text{N}_2$  adsorption-desorption isotherms and (b) pore size distribution of U1T5-CN-K, U5T1-CN-K and T-CN-K

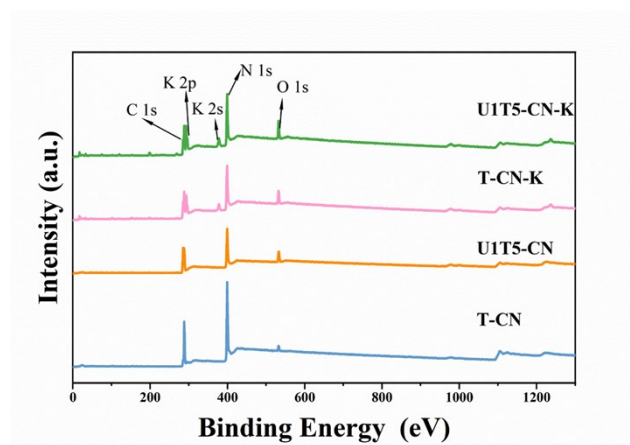

**Fig. S10** XPS survey spectra of the prepared samples.

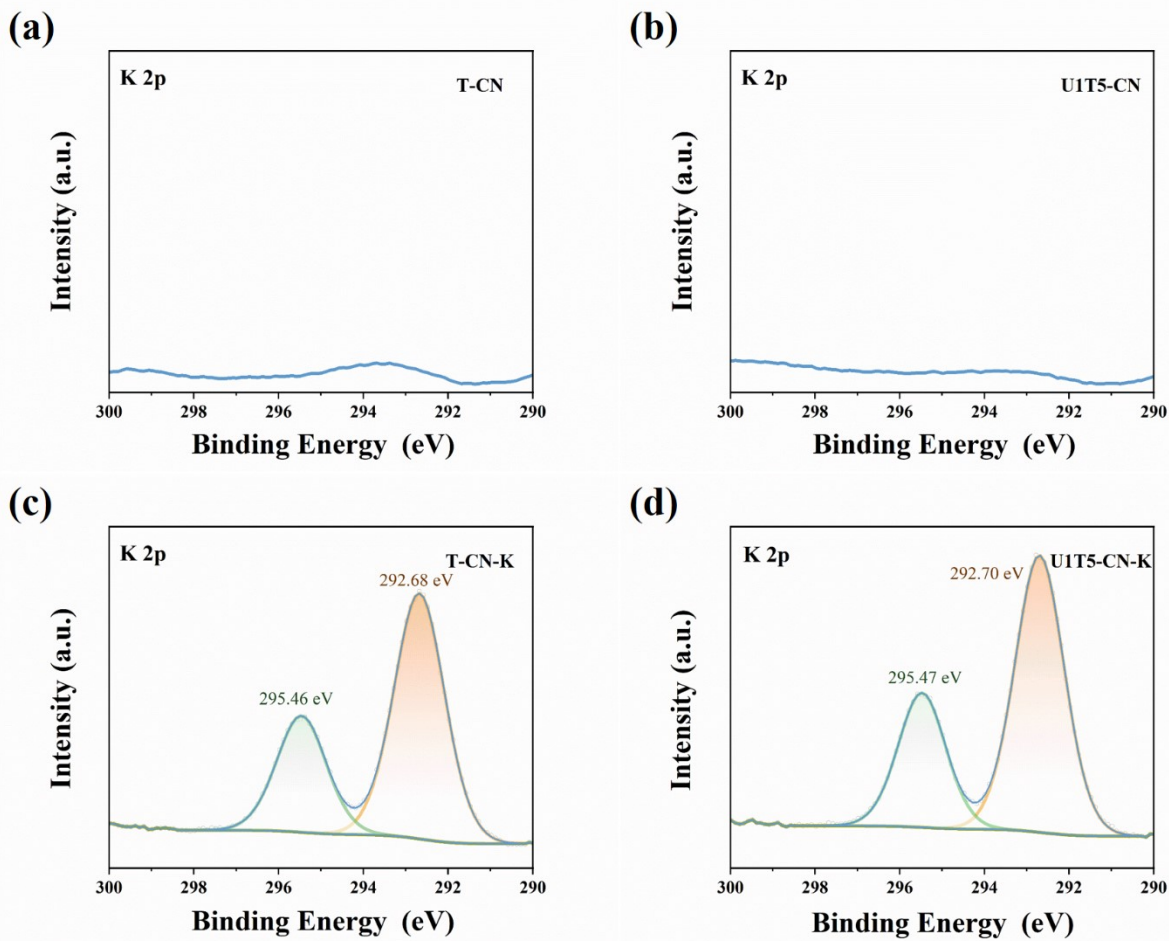

**Fig. S11** High-resolution XPS spectra of K 2p of (a) T-CN, (b) U1T5-CN, (c) T-CN-K and (d) U1T5-CN-K.

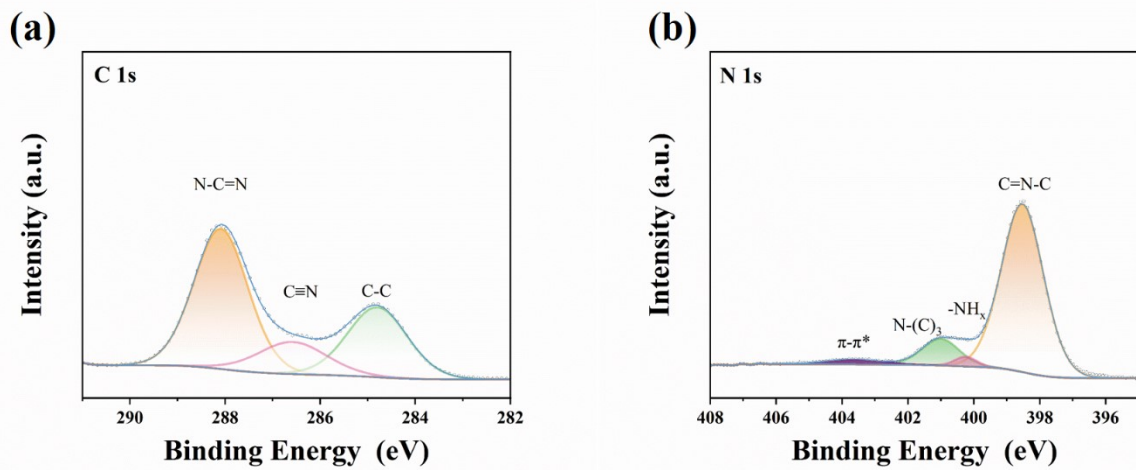

**Fig. S12** High-resolution XPS spectra of (a) C 1s and (b) N1s of U5T1-CN-K.

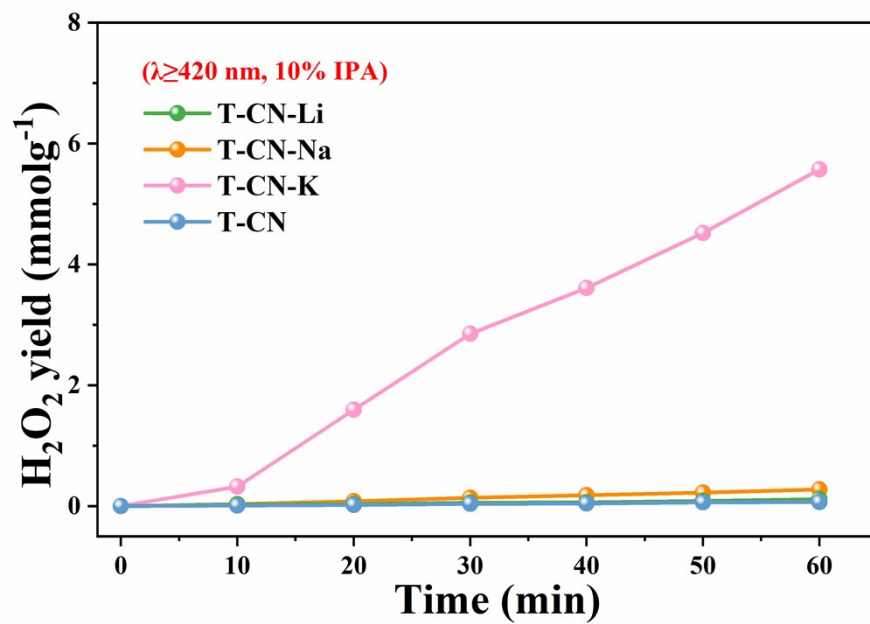

**Fig. S13** Photocatalytic yield of  $\text{H}_2\text{O}_2$  on photocatalysts doped with different alkali-metal elements

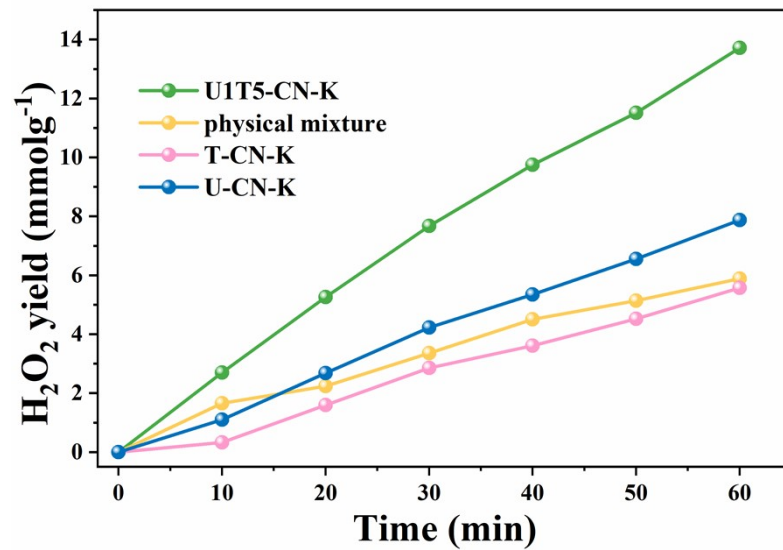

**Fig. S14** Photocatalytic yield of H<sub>2</sub>O<sub>2</sub> of U1T5-CN-K and physical mixture of U-CN-K and T-CN-K (mass ratio = 1:5).

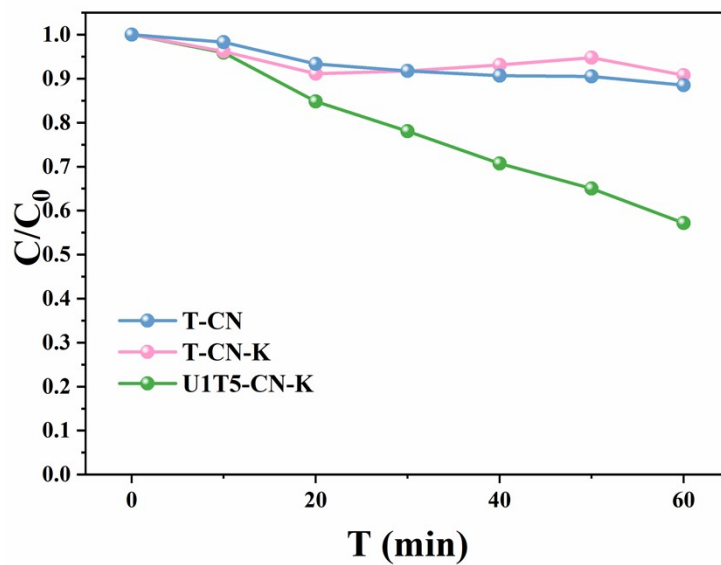

**Fig. S15** Photocatalytic decomposition of H<sub>2</sub>O<sub>2</sub> on different samples under visible light irradiation

( $\lambda \geq 420$  nm, 1 mM H<sub>2</sub>O<sub>2</sub> solution, 10 mg of catalyst, 25 °C)

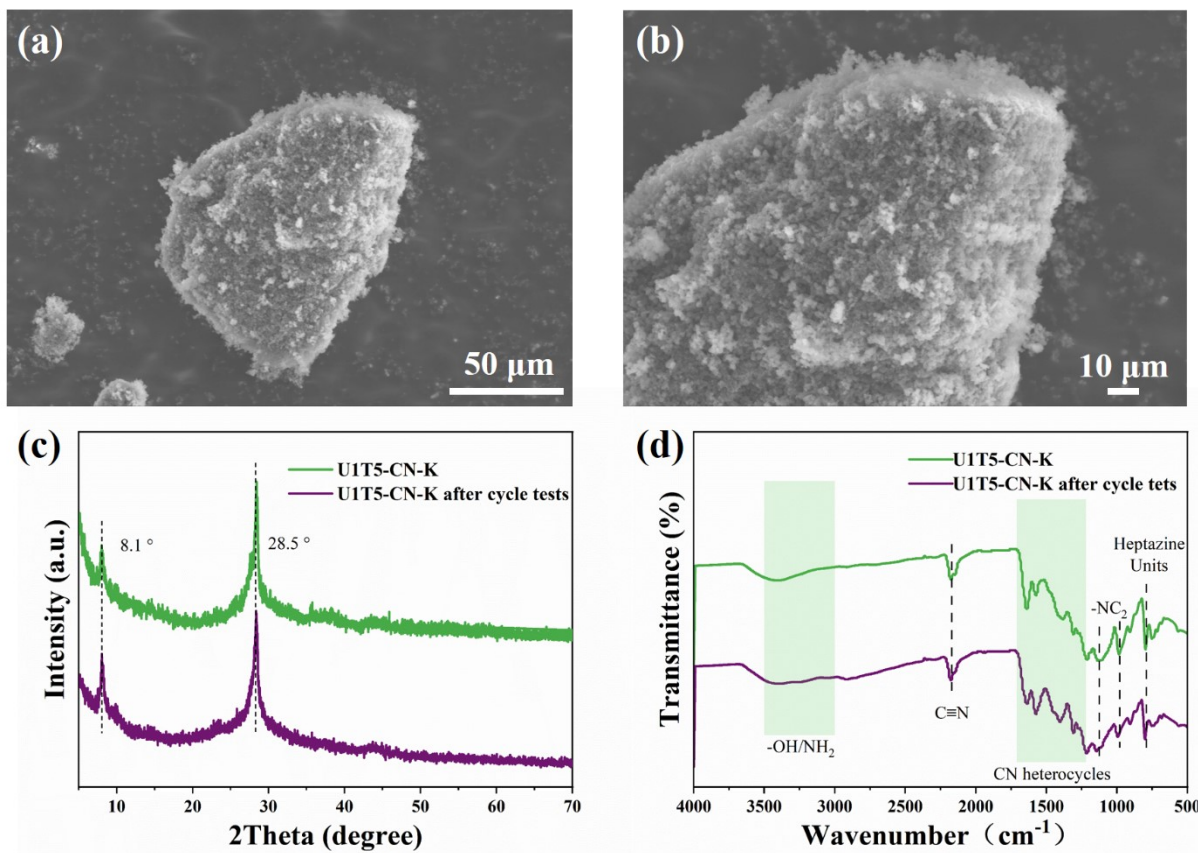

**Fig. S16** (a-b) SEM images, (c) XRD patterns, and (d) FT-IR spectra of UIT5-CN-K after stability tests.

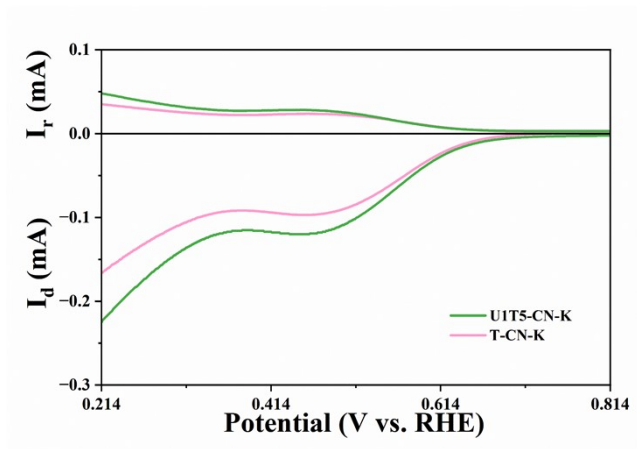

**Fig. S17** RRDE polarization curves over T-CN-K and U1T5-CN-K

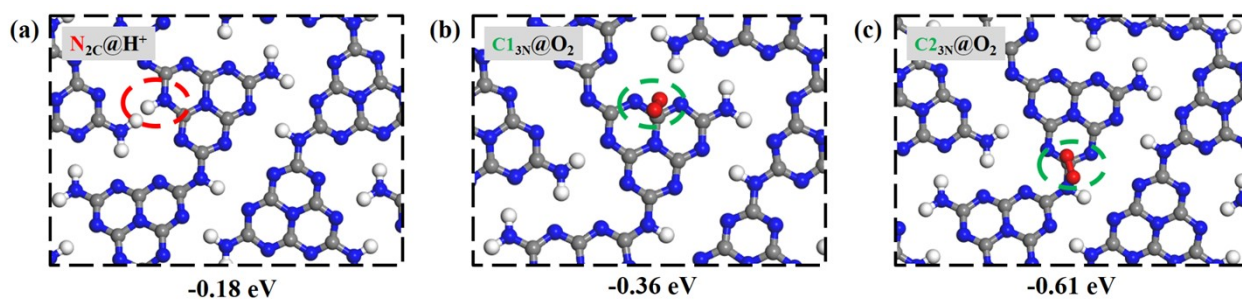

**Fig. S18** The position of  $H^+$  (red) and  $O_2$  (green) adsorption and the corresponding energy on T-CN.

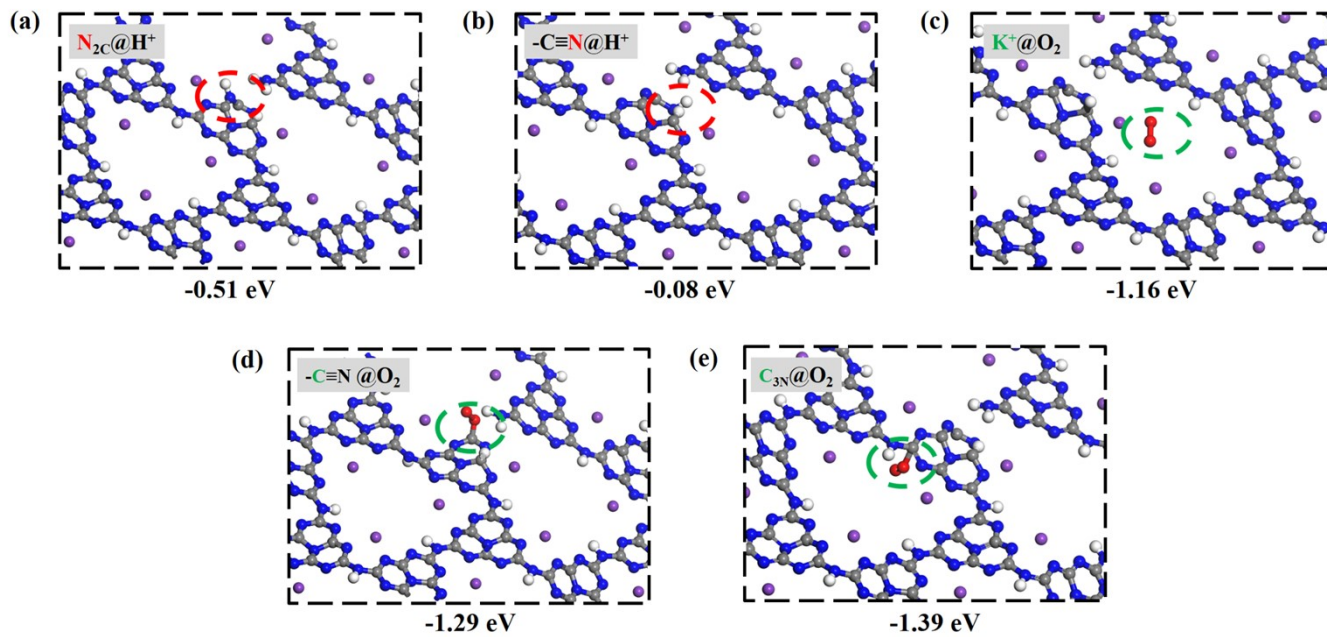

**Fig. S19** The position of  $H^+$  (red) and  $O_2$  (green) adsorption and the corresponding energy on UIT5-CN-K.

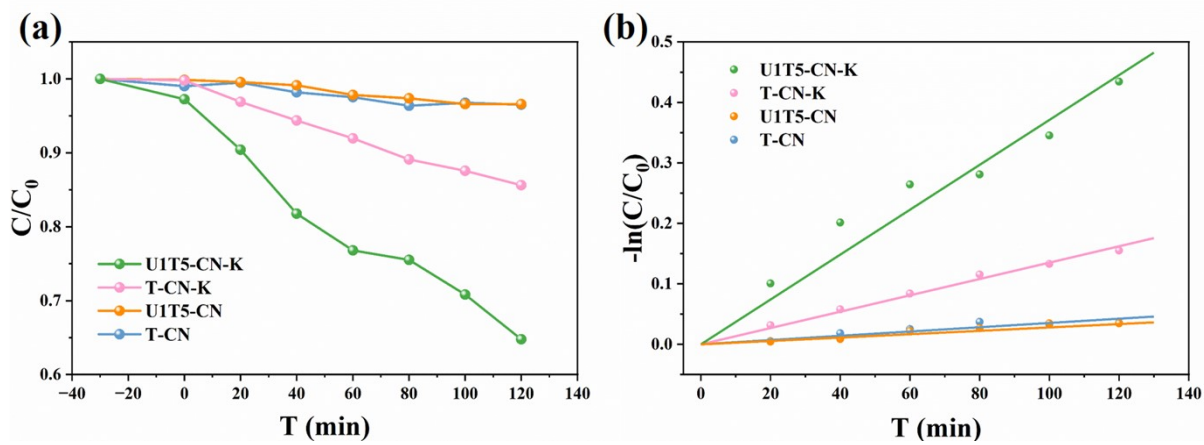

**Fig. S20** (a) The degradation activity and (b) the corresponding first-order kinetic curves of the catalysts

**Table S1.** chemicals and reagents

| <b>Chemical</b>       | <b>Grade</b>       | <b>Company</b>                                    |
|-----------------------|--------------------|---------------------------------------------------|
| Thiourea              | AR, 99.0%          | Shanghai Aladdin Biochemical Technology Co., Ltd. |
| Urea                  | AR                 | Sinopharm Chemical Reagent Co., Ltd.              |
| Potassium chloride    | AR                 | Sinopharm Chemical Reagent Co., Ltd.              |
| Anhydrous ethanol     | AR, 99.7%          | Shanghai Macklin Biochemical Co., Ltd.            |
| Nafion                | 5 wt%              | Shanghai Aladdin Biochemical Technology Co., Ltd. |
| Potassium iodide      | AR, 99.0%          | Shanghai Aladdin Biochemical Technology Co., Ltd. |
| Potassium biphthalate | AR, 99.8%          | Shanghai Macklin Biochemical Co., Ltd.            |
| Deionized water       | 18.2 M $\Omega$ cm | Self-made                                         |

**Table S2.** Calculated distance of (100) plane and (002) plane.

| <b>Photocatalysts</b> | <b>(100)</b>                |                           | <b>(002)</b>                |                           |
|-----------------------|-----------------------------|---------------------------|-----------------------------|---------------------------|
|                       | <b>2<math>\theta</math></b> | <b>Cal. Distance (nm)</b> | <b>2<math>\theta</math></b> | <b>Cal. Distance (nm)</b> |
| T-CN                  | 13.3 °                      | 0.665                     | 27.6 °                      | 0.323                     |
| U1T5-CN               | 13.3 °                      | 0.665                     | 27.9 °                      | 0.321                     |
| T-CN-K                | 8.1 °                       | 1.091                     | 28.5 °                      | 0.313                     |
| U1T5-CN-K             | 8.1 °                       | 1.091                     | 28.5 °                      | 0.313                     |

**Table S3.** Element contents of T-CN, U1T5-CN, T-CN-K and U1T5-CN-K determined by XPS.

| <b>Samples</b> | <b>C</b> | <b>N</b> | <b>O</b> | <b>K</b> |
|----------------|----------|----------|----------|----------|
| T-CN           | 43.71    | 53.36    | 2.94     | -        |
| U1T5-CN        | 58.52    | 34.35    | 7.12     | -        |
| T-CN-K         | 42.91    | 41.74    | 8.62     | 6.73     |
| U1T5-CN-K      | 37.94    | 45.4     | 4.03     | 12.63    |

**Table S4.** Relative ratios of C-C, -C≡N/C-NH<sub>x</sub> and N-C=N of the prepared photocatalysts determined by C 1s XPS spectra.

| Photocatalysts | Deconvoluted C 1s (at. %) |                        |       |
|----------------|---------------------------|------------------------|-------|
|                | C-C                       | -C≡N/C-NH <sub>x</sub> | N-C=N |
| T-CN           | 13.54                     | 3.25                   | 83.21 |
| U1T5-CN        | 49.38                     | 5.70                   | 44.92 |
| T-CN-K         | 39.09                     | 7.98                   | 52.93 |
| U1T5-CN-K      | 18.26                     | 20.35                  | 61.39 |
| U5T1-CN-K      | 30.00                     | 15.65                  | 54.36 |

**Table S5.** Relative ratios of C=N-C, -NH<sub>x</sub> and N-(C)<sup>3</sup> of the prepared photocatalysts determined by N 1s XPS spectra.

| Photocatalysts | Deconvoluted N 1s (at. %) |                  |                    |
|----------------|---------------------------|------------------|--------------------|
|                | C=N-C                     | -NH <sub>x</sub> | N-(C) <sup>3</sup> |
| T-CN           | 76.85                     | 12.92            | 10.24              |
| U1T5-CN        | 75.75                     | 13.71            | 10.53              |
| T-CN-K         | 85.54                     | 3.26             | 11.19              |
| U1T5-CN-K      | 85.59                     | 3.00             | 11.41              |
| U5T1-CN-K      | 85.46                     | 3.15             | 11.40              |

**Table S6.** H<sub>2</sub>O<sub>2</sub> production performance of the catalysts with different ratios of urea/thiourea.

| <b>Photocatalysts</b> | <b>ratios of urea/thiourea</b> | <b>H<sub>2</sub>O<sub>2</sub> Production rate (mmol g<sup>-1</sup> h<sup>-1</sup>)</b> |
|-----------------------|--------------------------------|----------------------------------------------------------------------------------------|
| U1T5-CN-K             | 1:5                            | 13.71                                                                                  |
| U3T3-CN-K             | 3:3                            | 10.78                                                                                  |
| U5T1-CN-K             | 5:1                            | 9.68                                                                                   |

**Table S7.** H<sub>2</sub>O<sub>2</sub> production performance of the catalysts and the enhancement ratio compared to UIT5-CN-K.

| <b>Photocatalysts</b> | <b>H<sub>2</sub>O<sub>2</sub> Production rate (mmolg<sup>-1</sup>h<sup>-1</sup>)</b> | <b>Ratio<br/>(UIT5-CN-K vs sample)</b> |
|-----------------------|--------------------------------------------------------------------------------------|----------------------------------------|
| T-CN                  | 0.068                                                                                | 201.6                                  |
| UIT5-CN               | 0.113                                                                                | 121.3                                  |
| T-CN-K                | 5.57                                                                                 | 2.5                                    |
| UIT5-CN-K             | 13.71                                                                                | 1.0                                    |

**Table S8.** Wavelength-dependent AQY for U1T5-CN-K in photocatalytic H<sub>2</sub>O<sub>2</sub> generation.

| <b>Wavelength</b> | <b>H<sub>2</sub>O<sub>2</sub></b> | <b>Irradiation</b>       | <b>Irradiation area</b> | <b>Irradiation time</b> | <b>AQY(%)</b> |
|-------------------|-----------------------------------|--------------------------|-------------------------|-------------------------|---------------|
| <b>h</b>          | <b>yield</b>                      | <b>intensity</b>         | <b>(m<sup>2</sup>)</b>  | <b>(s)</b>              |               |
| <b>(nm)</b>       | <b>(μmol)</b>                     | <b>(Wm<sup>-2</sup>)</b> |                         |                         |               |
| 400               | 155.9                             | 531.9                    | 3.32×10 <sup>-3</sup>   | 3600                    | 1.47          |
| 420               | 164.3                             | 565.8                    | 3.32×10 <sup>-3</sup>   | 3600                    | 1.39          |
| 450               | 97.6                              | 651.0                    | 3.32×10 <sup>-3</sup>   | 3600                    | 0.67          |
| 475               | 10.1                              | 667.7                    | 3.32×10 <sup>-3</sup>   | 3600                    | 0.064         |
| 500               | 7.75                              | 605.4                    | 3.32×10 <sup>-3</sup>   | 3600                    | 0.051         |

**Table S9.** Comparison of the performance of photocatalytic H<sub>2</sub>O<sub>2</sub> production in the reported literature.

| Photocatalyst                         | Reaction solution | Catalyst dose         | Light source                             | H <sub>2</sub> O <sub>2</sub> yield           | Ref.      |
|---------------------------------------|-------------------|-----------------------|------------------------------------------|-----------------------------------------------|-----------|
| UIT5-CN-K                             | isopropanol (10%) | 0.2 g L <sup>-1</sup> | 300W Xe lamp<br>( $\lambda \geq 420$ nm) | 13.71<br>mmol g <sup>-1</sup> h <sup>-1</sup> | this work |
| ACNN                                  | isopropanol (10%) | 0.5 g L <sup>-1</sup> | 300W Xe lamp<br>( $\lambda \geq 420$ nm) | 10.2<br>mmol g <sup>-1</sup> h <sup>-1</sup>  | 1         |
| KCN-4                                 | isopropanol (10%) | 0.2 g L <sup>-1</sup> | 300W Xe lamp<br>( $\lambda \geq 420$ nm) | 6.12<br>mmol g <sup>-1</sup> h <sup>-1</sup>  | 2         |
| P, N-C@CNHS                           | isopropanol (10%) | 0.5 g L <sup>-1</sup> | 300W Xe lamp<br>( $\lambda \geq 420$ nm) | 4.57<br>mmol g <sup>-1</sup> h <sup>-1</sup>  | 3         |
| Ni-UPGCN                              | isopropanol (10%) | 2.0 g L <sup>-1</sup> | 300W Xe lamp<br>( $\lambda \geq 420$ nm) | 4.12<br>mmol g <sup>-1</sup> h <sup>-1</sup>  | 4         |
| Br-PCN                                | isopropanol (10%) | 1.0 g L <sup>-1</sup> | 300W Xe lamp<br>( $\lambda \geq 420$ nm) | 3.98<br>mmol g <sup>-1</sup> h <sup>-1</sup>  | 5         |
| MCN-200B-LiK                          | ethanol (10%)     | 1.0 g L <sup>-1</sup> | 300W Xe lamp<br>( $\lambda \geq 420$ nm) | 2.42<br>mmol g <sup>-1</sup> h <sup>-1</sup>  | 6         |
| B-CN/P-CN                             | ethanol (10%)     | 0.4 g L <sup>-1</sup> | 300W Xe lamp<br>( $\lambda \geq 420$ nm) | 2.20<br>mmol g <sup>-1</sup> h <sup>-1</sup>  | 7         |
| CACN                                  | ethanol (10%)     | 0.4 g L <sup>-1</sup> | 300 W xenon<br>lamp (AM 1.5)             | 1.60<br>mmol g <sup>-1</sup> h <sup>-1</sup>  | 8         |
| KCN-6                                 | ethanol (10%)     | 0.5 g L <sup>-1</sup> | 300W Xe lamp<br>( $\lambda \geq 420$ nm) | 0.82<br>mmol g <sup>-1</sup> h <sup>-1</sup>  | 9         |
| B-g-C <sub>3</sub> N <sub>4</sub> -20 | isopropanol (10%) | 1.0 g L <sup>-1</sup> | 300W Xe lamp<br>( $\lambda \geq 420$ nm) | 0.42<br>mmol g <sup>-1</sup> h <sup>-1</sup>  | 10        |

**Table S10.** H<sub>2</sub>O<sub>2</sub> production performance of UIT5-CN-K in the presence of various trapping agents

| <b>Gents</b>                            | <b>H<sub>2</sub>O<sub>2</sub> production rate<br/>(mmol g<sup>-1</sup> h<sup>-1</sup>)</b> | <b>Ratio (%)<br/>to original performance</b> |
|-----------------------------------------|--------------------------------------------------------------------------------------------|----------------------------------------------|
| N <sub>2</sub>                          | 0.540                                                                                      | 3.9%                                         |
| AgNO <sub>3</sub>                       | 0.268                                                                                      | 2.0%                                         |
| Nitroblue tetrazolium chloride<br>(NBT) | 2.404                                                                                      | 17.5%                                        |
| Pure water                              | 0.865                                                                                      | 6.30%                                        |

**Table S11.** The TH (170 mg L<sup>-1</sup>) degradation performance of the prepared photocatalysts

| <b>Catalyst</b> | <b>Degradation rate (%)</b> | <b>The amount of degraded TH</b> | <b>k value</b>            |
|-----------------|-----------------------------|----------------------------------|---------------------------|
|                 |                             | <b>(mg L<sup>-1</sup>)</b>       | <b>(min<sup>-1</sup>)</b> |
| T-CN            | 3.50                        | 5.95                             | 0.0356                    |
| U1T5-CN         | 3.42                        | 5.81                             | 0.0348                    |
| T-CN-K          | 14.38                       | 24.45                            | 0.1553                    |
| U1T5-CN-K       | 35.22                       | 59.87                            | 0.4342                    |

## References

1. S. Wu, H. Yu, S. Chen and X. Quan, *ACS Catal.*, 2020, 10, 14380-14389.
2. Y. Wang, X. Shi, W. Li, Y. Wang and W. Yao, *ACS Omega*, 2024, 9, 41043-41052.
3. X. Dang, X. Cui, H. Zhang, X. Chen and H. Zhao, *ACS Sustainable Chem. Eng.*, 2023, 11, 13096-13107.
4. X. Zhou, K. Wang, Y. Wang, Y. Cao, J. Wang, H. Hu, G. Yang, J. Hou, P. Ma, C. Gao, C. Ban, Y. Duan, Z. Wei, X. Zhang, C. Wang and K. Zheng, *Langmuir*, 2024, 40, 11251-11262.
5. A. Gupta, T. Bhoyar, B. M. Abraham, D. J. Kim, K. S. Pasupuleti, S. S. Umare, D. Vidyasagar and A. Gedanken, *ACS Appl. Mater. Interfaces*, 2023, 15, 18898-18906.
6. C. Xu, W. Zheng, X. Liu, J. Li, W. Lai, X. Liang, Y. Chen, D. Fan and H. Pan, *J. Mater. Chem. A*, 2026,
7. S. Khan, M. A. Qaiser, W. A. Qureshi, Y. Xu, J. Li, H. Li, L. Sun, S. N.-u.-Z. Haider, B. Zhu, L. Wang, W. Wang and Q. Liu, *ACS Appl. Mater. Interfaces*, 2025, 17, 6249-6259.
8. Q. Xu, J. Wu, Y. Qian, X. Chen, Y. Han, X. Zeng, B. Qiu and Q. Zhu, *ACS Appl. Mater. Interfaces*, 2024, 16, 784-794.
9. X. Tantai, Q. Zhou, L. Shi, M. Wu, P. Sun and X. Dong, *ACS Appl. Nano Mater.*, 2025, 8, 19001-19011.
10. T. Wang, L. Zhang, L. Sun, J. Zhao, Y. Wang, Z. Qu and Y. Wang, *ACS Appl. Nano Mater.*, 2025, 8, 16533-16539.
